# Supplementary material
Source: PubMed Central journal article supplement (PMC3056542)

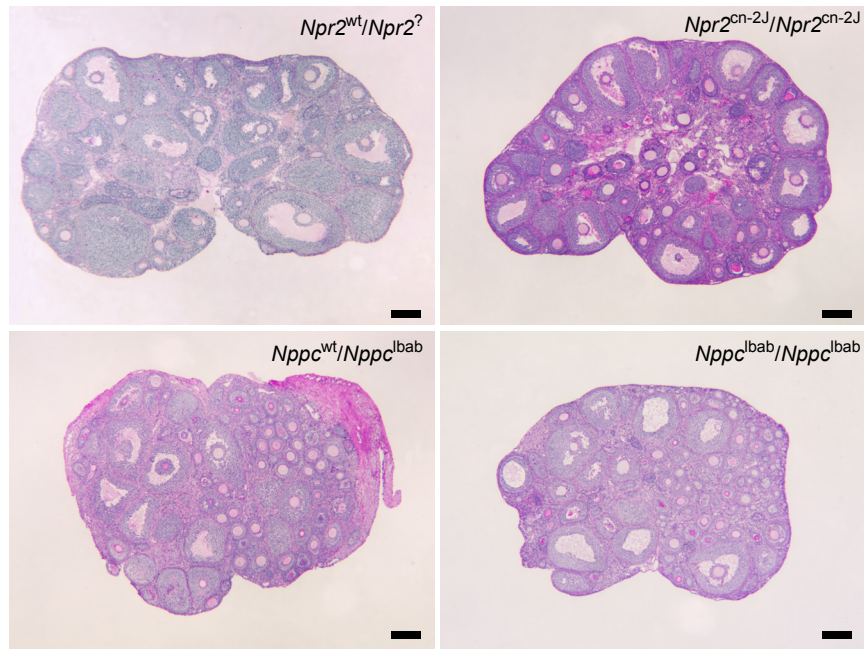

Supplemental Figure 2

Supplement: NIHMS270080-supplement-Supplemental_2.pdf [file NIHMS270080-supplement-Supplemental_2.pdf]
